# Supplementary material for: Implementation of a dynamic intestinal gut-on-a-chip barrier model for transport studies of lipophilic dioxin congeners
Source: PubMed Central journal article supplement — RSC Adv. 2018 Sep 19;8(57):32440–53. doi: 10.1039/c8ra05430d (PMC9086222; doi:10.1039/c8ra05430d), 2018-09-19
Supplement: RA-008-C8RA05430D-s001.pdf [file RA-008-C8RA05430D-s001.pdf]

Supp Table 1. Dioxin adsorption during transport experiments. Adsorption was measured by rinsing the systems with hexane and measurement with GC-HRMS.

| Congeners           | Adsorption in various compartments (%) |      |      |      | Total adsorption (%) |      |
|---------------------|----------------------------------------|------|------|------|----------------------|------|
|                     | Chip                                   |      | TW   |      | Chip                 | TW   |
|                     | AP                                     | BL   | AP   | BL   |                      |      |
| 2,3,7,8-TCDF        | 5.40                                   | 0.57 | 5.08 | 0.37 | 5.97                 | 5.45 |
| 1,2,3,7,8-PeCDF     | 3.50                                   | 0.44 | 2.86 | 0.17 | 3.94                 | 3.03 |
| 2,3,4,7,8-PeCDF     | 3.88                                   | 0.52 | 3.95 | 0.11 | 4.40                 | 4.06 |
| 1,2,3,4,7,8-HxCDF   | 4.03                                   | 0.42 | 3.46 | 0.05 | 4.45                 | 3.50 |
| 1,2,3,6,7,8-HxCDF   | 1.87                                   | 0.37 | 1.94 | 0.05 | 2.24                 | 1.98 |
| 2,3,4,6,7,8-HxCDF   | 2.20                                   | 0.37 | 2.38 | 0.05 | 2.57                 | 2.44 |
| 1,2,3,7,8,9-HxCDF   | 3.43                                   | 0.40 | 3.08 | 0.06 | 3.84                 | 3.14 |
| 1,2,3,4,6,7,8-HpCDF | 1.42                                   | 0.36 | 1.18 | 0.06 | 1.78                 | 1.24 |
| 1,2,3,4,7,8,9-HpCDF | 3.00                                   | 0.39 | 2.60 | 0.04 | 3.38                 | 2.64 |
| OCDF                | 2.57                                   | 0.40 | 1.29 | 0.11 | 2.97                 | 1.39 |
| 2,3,7,8-TCDD        | 7.23                                   | 0.67 | 4.91 | 0.40 | 7.90                 | 5.31 |
| 1,2,3,7,8-PeCDD     | 4.21                                   | 0.52 | 3.62 | 0.14 | 4.74                 | 3.76 |
| 1,2,3,4,7,8-HxCDD   | 4.18                                   | 0.43 | 3.86 | 0.06 | 4.61                 | 3.91 |
| 1,2,3,6,7,8-HxCDD   | 1.61                                   | 0.34 | 1.72 | 0.06 | 1.95                 | 1.79 |
| 1,2,3,7,8,9-HxCDD   | 1.72                                   | 0.31 | 1.65 | 0.05 | 2.03                 | 1.71 |
| 1,2,3,4,6,7,8-HpCDD | 2.56                                   | 0.43 | 2.12 | 0.05 | 3.00                 | 2.18 |
| OCDD                | 2.78                                   | 0.82 | 1.34 | 0.18 | 3.60                 | 1.52 |
